# Supplementary material for: CCR9 Promotes Migration and Invasion of Lung Adenocarcinoma Cancer Stem Cells
Source: PubMed Central journal article supplement (PMC7163367; doi:10.7150/ijms.40864), 2020-03-26
Supplement: ijmsv17p0912s1.pdf [file ijmsv17p0912s1.pdf]

**Supplementary Figure 1. The expression of CCL25 in lung adenocarcinoma.**

Immunohistochemistry was performed to detect the expression of CCL25 in lung adenocarcinoma tissues. (A) and (B) demonstrate negative CCL25 expression in two samples. Original magnification: 400 $\times$ .

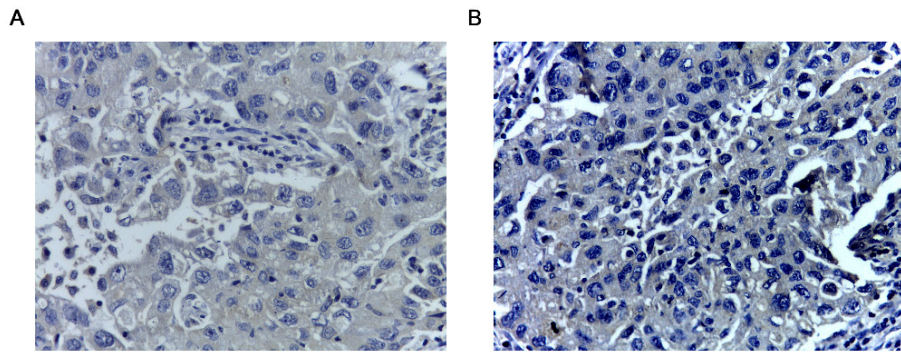

Supplementary Figure 1
